# Supplementary material for: Distribution of Porcine Cytomegalovirus in Infected Donor Pigs and in Baboon Recipients of Pig Heart Transplantation
Source: PubMed Central journal article supplement (PMC5850373; doi:10.3390/v10020066), 2018-02-06
Supplement: viruses-10-00066-s001.pdf [file viruses-10-00066-s001.pdf]

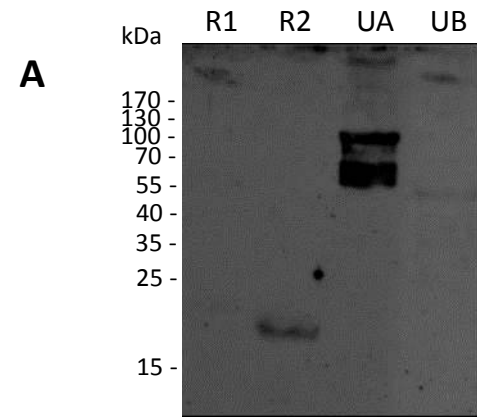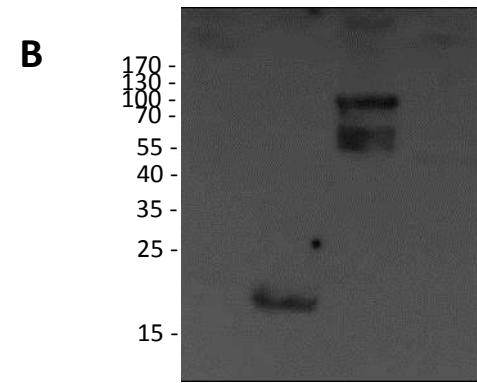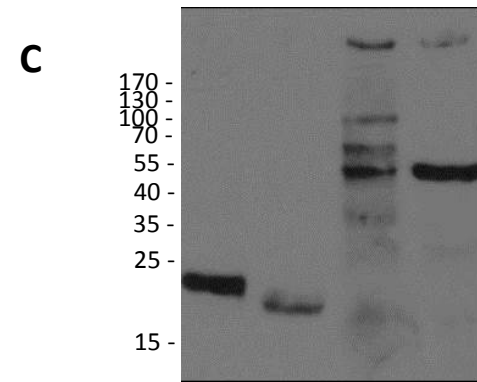

|                        |   |   |   |    |   |   |    |   |   |    |   |   |    |   |   |   |   |   |   |   |   |   |   |   |   |   |   |   |   |   |   |   |   |   |   |   |   |   |   |   |   |   |   |
|------------------------|---|---|---|----|---|---|----|---|---|----|---|---|----|---|---|---|---|---|---|---|---|---|---|---|---|---|---|---|---|---|---|---|---|---|---|---|---|---|---|---|---|---|---|
|                        | 1 |   |   | 10 |   |   | 20 |   |   | 30 |   |   | 40 |   |   |   |   |   |   |   |   |   |   |   |   |   |   |   |   |   |   |   |   |   |   |   |   |   |   |   |   |   |   |
| BaCMV_GlyB_R2_AF324835 | V | I | Y | L  | I | Y | M  | R | O | K  | R | V | Y  | Q | Q | P | I | Q | L | F | P | Y | I | A | P | P | P | A | P | A | - | - | - | - | - | - | - | K | E | T | T |   |   |
| PCMV_GlyB_R2_AF268039  | F | L | I | F  | S | V | Y  | Y | R | O  | K | N | I  | Y | T | N | P | V | G | A | L | F | P | Y | A | N | S | S | S | G | T | V | I | S | N | T | H | S | Y | Y | E | T | N |
| BaCMV_GlyB_R2_AF324835 | P | P | P | S  | Y | E | E  | S | L | Y  | A | S | I  | K | E | K | - | S | S | A | S | V | K | E | F | S | S | E | E | A | F | Q | M | L | L | A | L | H | K | L | - | D | V |
| PCMV_GlyB_R2_AF268039  | N | K | Q | E  | F | E | N  | D | R | K  | P | D | T  | S | N | A | V | S | E | G | S | A | N | K | Y | S | Q | E | D | A | V | C | M | L | M | A | I | K | N | L | G | D | A |
| BaCMV_GlyB_R2_AF324835 | E | K | R | E  | K | L | K  | E | E | S  | E | K | A  | A | S | Q | S | G | K | V | G | L | L | D | R | V | R | N | R | R | R | G | Y | K | P | V | E | E | N | E | Y | E | V |
| PCMV_GlyB_R2_AF268039  | Y | R | R | K  | N | A | T  | K | P | S  | P | - | -  | - | - | - | - | - | - | - | S | V | L | D | K | I | R | H | L | E | - | - | Y | Q | Q | L | S | T | E | D | V |   |   |
